# Supplementary material
Source: PubMed Central journal article supplement (PMC7062570)
Supplement: NIHMS1542349-supplement-9_New_Online_repository_text.pdf [file NIHMS1542349-supplement-9_New_Online_repository_text.pdf]

# 1 Untargeted Metabolomic Profiling Identifies Disease-specific

## 2 Signatures in Food Allergy and Asthma

3  
4 Elena Crestani MD, MS<sup>1</sup>, Hani Harb PhD<sup>1</sup>, Louis-Marie Charbonnier PhD<sup>1</sup>, Jonathan  
5 Leirer MS<sup>2</sup>, Alison Motsinger-Reif PhD<sup>3</sup>, Rima Rachid MD<sup>1</sup>, Wanda Phipatanakul MD,  
6 MS<sup>1</sup>, Rima Kaddurah-Daouk PhD<sup>4</sup>, Talal A. Chatila MD, MSc<sup>1</sup>

7  
8  
9 <sup>1</sup>Division of Immunology, Boston Children's Hospital and Department of Pediatrics,  
10 Harvard Medical School, Boston, MA; <sup>2</sup>Bioinformatics Research Center, Department of  
11 Statistics, North Carolina State University, Raleigh, NC; <sup>3</sup>Biostatistics and Computational  
12 Biology Branch, National Institute of Environmental Health Sciences, Durham NC;  
13 <sup>4</sup>Department of Psychiatry and Behavioral Sciences and the Duke Institute for Brain  
14 Sciences, Duke University, Durham, NC

15 Corresponding Author: Talal A. Chatila, MD, MSc, Division of Immunology, Boston  
16 Children's Hospital and Harvard Medical School, Karp Family Building RB10-214, 1  
17 Blackfan Circle, Boston, MA 02115.

18 E-mail: [talal.chatila@childrens.harvard.edu](mailto:talal.chatila@childrens.harvard.edu)

19  
20 **Funding Sources:** This work was supported in part by the National Institutes of Health  
21 (grants no. R01 AI065617 and R21 AI132843) to T.A.C.

23 **Disclosure Statement:** All authors declare no direct financial interest in subject matter  
24 or materials discussed in article, or with a company making a competing product.  
25

26 **Supplementary Figure and Table Legends**

27

28 **Fig E1.** Heat-map of metabolites significantly different ( $p < 0.005$ ) between asthmatic  
29 children and non-atopic controls. For each metabolite, a colorimetric representation of  
30 relative expression in each sample is shown according to the scale depicted on top.  
31 Metabolites are grouped into main dysregulated pathways and a miscellaneous category.

32

33 **Fig. E2.** Comparison of sphingomyelin and ceramide metabolites of interest displayed in  
34 Figure 3 across all study groups. Mean and SEM are shown. \* $p \leq 0.05$ , \*\*  $p \leq 0.005$ , \*\*\*  
35  $p \leq 0.001$

36

37 **Fig. E3.** Comparison of tryptophan metabolites of interest displayed in Figure 5 across all  
38 study groups. Mean and SEM are shown. \* $p \leq 0.05$ , \*\*  $p \leq 0.005$

39

40 **Fig. E4.** Comparison of bile acid ratios of interest displayed in Figure 6 across all study  
41 groups. Mean and SEM are shown. \* $p \leq 0.05$

42

43 **Fig. E5.** Pathway analysis and Random Forrest Analysis of metabolites significantly  
44 dysregulated between FA children and controls. Panel **A** shows the fold increase over  
45 controls of the most dysregulated pathways in children with FA. Panel **B** shows the top  
46 thirty metabolites that most strongly discriminate between children with FA and controls.

47

48 **Fig. E6.** Pathway analysis and Random Forrest Analysis of metabolites significantly  
49 dysregulated between FA and asthmatic children. Panel **A** shows the fold increase over  
50 controls of the most dysregulated pathways in children with FA. Panel **B** shows the top  
51 thirty metabolites that most strongly discriminate between children with FA and asthma.

52

53 **Table E1.** Patient Demographics and clinical attributes.

54

55 **Table E2.** List of metabolites significantly different ( $p \leq 0.005$ ) in pairwise comparisons of  
56 children with FA and non-atopic controls. Metabolite name, pathway, unadjusted and  
57 Atopic Dermatitis (AD) adjusted p-values are listed.

58

59 **Table E3.** List of metabolites significantly different ( $p \leq 0.005$ ) in pairwise comparisons of  
60 children with FA and asthma. Metabolite name, pathway, unadjusted and Atopic  
61 Dermatitis (AD) adjusted p-values are listed.

62

63 **Table E4.** List of metabolites significantly different ( $p \leq 0.005$ ) in pairwise comparisons of  
64 children with asthma and non-atopic controls. Metabolite name, pathway, unadjusted and  
65 Atopic Dermatitis (AD) adjusted p-values are listed.

66

67 **Table E5.** List of metabolites statistically different ( $p \leq 0.05$ ) in pairwise comparisons  
68 between children with FA allergy to one and multiple food items. Metabolite name,  
69 pathway, and p-values are listed.

70

71 **Table E6.** List of metabolites significantly different ( $p \leq 0.05$ ) in pairwise comparisons  
72 between food allergic children with and without history of anaphylaxis. Metabolite name,  
73 pathway, and p-values are listed.

74

75 **Table E7.** List of metabolites significantly different ( $p \leq 0.05$ ) in pairwise comparisons  
76 between food allergic children without Atopic Dermatitis and non-atopic controls.  
77 Metabolite name, pathway, and p-values are listed.

78

79

80

81

82

83
